# Supplementary material
Source: PubMed Central journal article supplement (PMC6976637)
Supplement: 41396_2019_528_MOESM6_ESM.pdf [file 41396_2019_528_MOESM6_ESM.pdf]

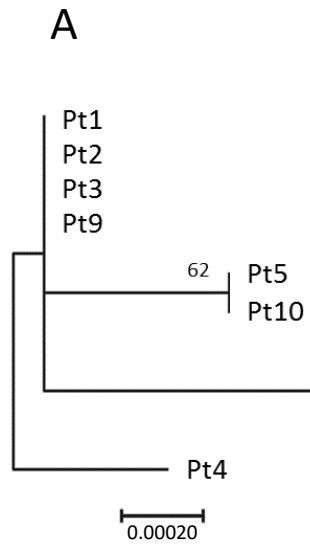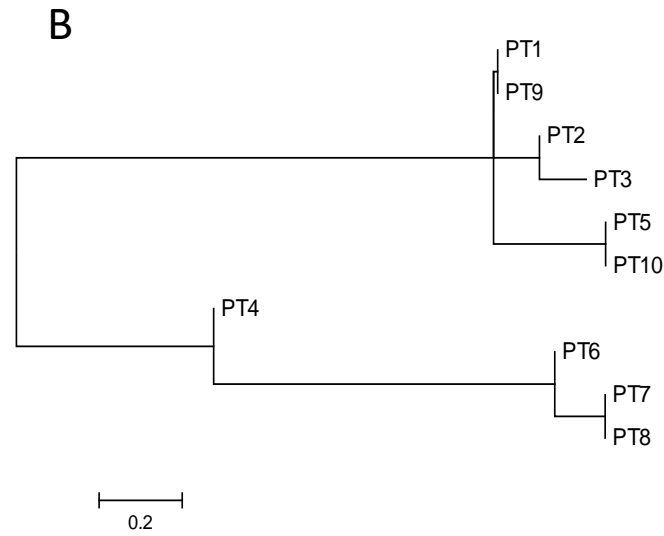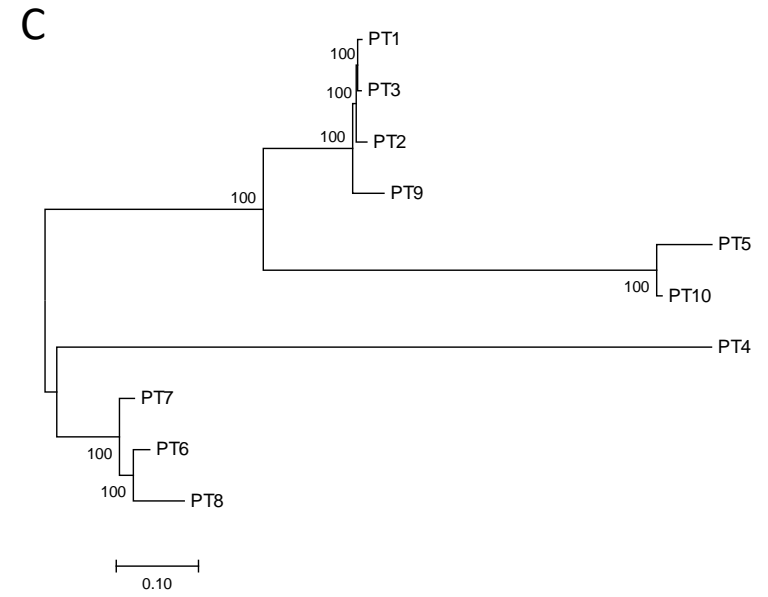

**D**

|         |                    | Ecotypes | 43842    | 44749      | 44822      | 45246    | 45261      |
|---------|--------------------|----------|----------|------------|------------|----------|------------|
| Clade A | Pt1                |          | G        | T          | G          | C        | A          |
|         | Pt2                |          | G        | T          | G          | C        | A          |
|         | Pt3                |          | G        | T          | G          | C        | A          |
|         | <b>Pt3Ov</b>       |          | <b>G</b> | <b>T</b>   | <b>G</b>   | <b>C</b> | <b>A</b>   |
|         | <b>Pt3Ov (RNA)</b> |          | <b>G</b> | <b>T</b>   | <b>G</b>   | <b>C</b> | <b>A</b>   |
|         | Pt9                |          | G        | T          | G          | C        | A          |
| Clade B | Pt4                |          | G        | T          | G          | C/A      | A          |
| Clade C | Pt5                |          | G/A      | T          | G          | C        | A          |
|         | Pt10               |          | G/A      | T          | G          | C        | A          |
| Clade D | Pt6                |          | G        | T/C        | G/C        | C        | A/G        |
|         | Pt7                |          | G/A      | T/C        | G/C        | C        | A/G        |
|         | Pt8                |          | G        | T/C        | G/C        | C        | A/G        |
|         | <b>Pt8Tc</b>       |          | <b>G</b> | <b>T/C</b> | <b>G/C</b> | <b>C</b> | <b>A/G</b> |
|         | <b>Pt8Tc (RNA)</b> |          | <b>G</b> | <b>T/C</b> | <b>G/C</b> | <b>C</b> | <b>A/G</b> |

**E**

|         |      | ECOTYPES | 42658 | 42670 | 42700 | 42751 | 42819 | 42951 |
|---------|------|----------|-------|-------|-------|-------|-------|-------|
| Clade A | Pt1  |          | A     | G     | T     | G     | T     | G     |
|         | Pt2  |          | A     | G     | T     | G     | T     | G     |
|         | Pt3  |          | A     | A     | T     | G     | T     | G     |
|         | Pt9  |          | A     | G     | T     | G     | T     | G     |
| Clade B | Pt4  |          | G     | G     | T     | G/A   | C     | G     |
| Clade C | Pt5  |          | A     | G     | T/A   | G     | T     | A     |
|         | Pt10 |          | A     | G     | T/A   | G     | T     | A     |
| Clade D | Pt6  |          | G     | G     | T     | G     | C     | G     |
|         | Pt7  |          | G     | G     | T     | G     | C     | G     |
|         | Pt8  |          | G     | G     | T     | G     | C     | G     |
