# Supplementary material
Source: PubMed Central journal article supplement (PMC6976637)

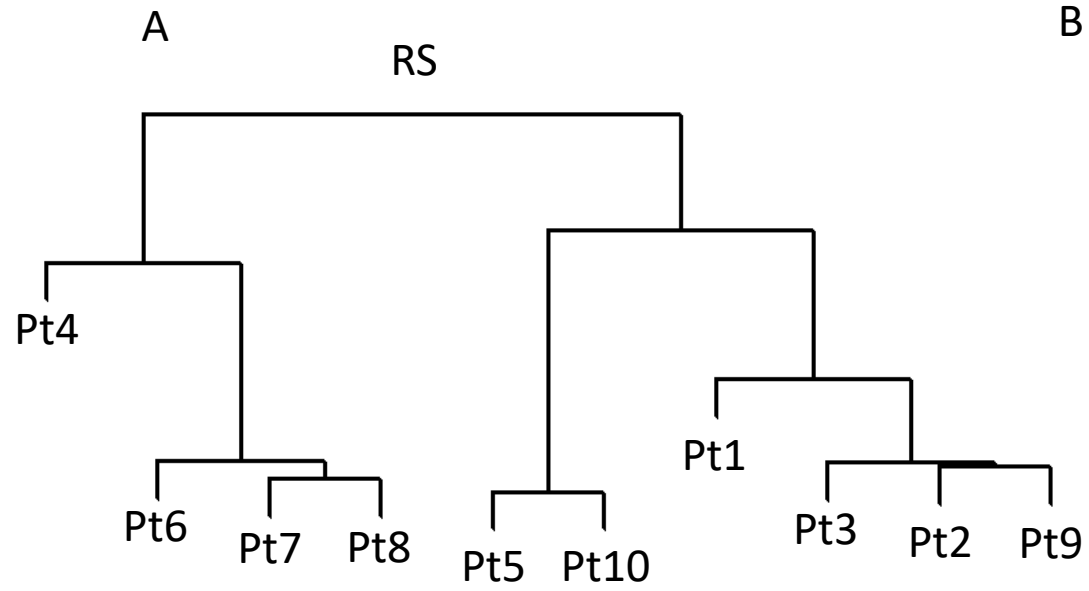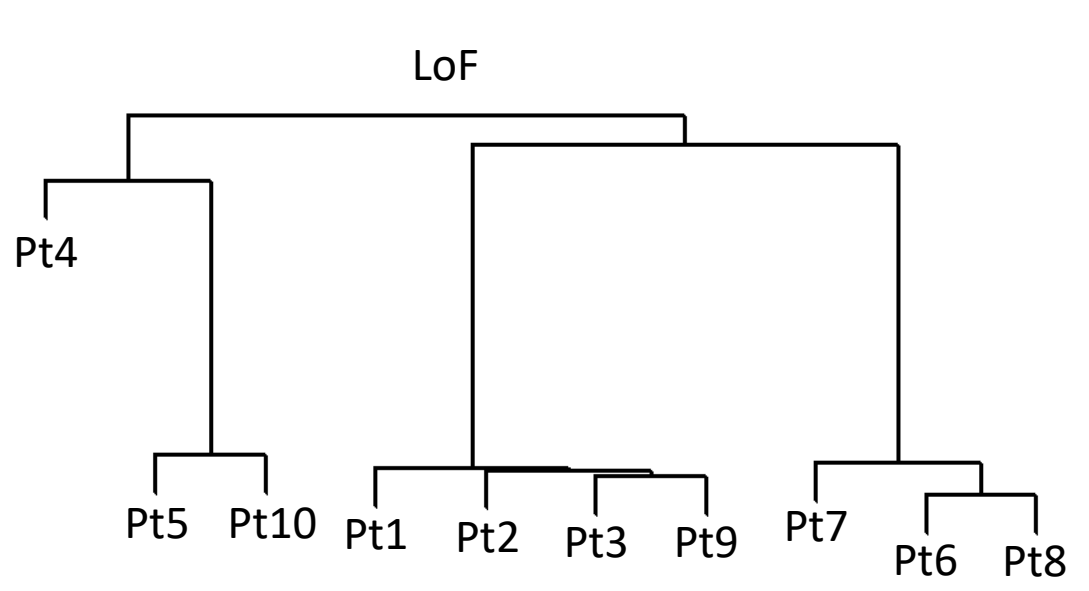

Supplement: 41396_2019_528_MOESM10_ESM.pdf [file 41396_2019_528_MOESM10_ESM.pdf]
